# Supplementary material
Source: Elsevier journal article supplement (https://www.sciencedirect.com/science/article/pii/S0212656721000263)
Supplement: mmc1 [file S0212656721000263:mmc1.doc]

**Anexo A.** Ítems del cuestionario sobre nuevas tecnologías para transmitir la violencia de género.

| 1 | Dar mi nombre y apellidos a una persona desconocida |
| --- | --- |
| 2 | Dar mi dirección de casa |
| 3 | Colgar una foto mía con una actitud sensual |
| 4 | Quedar con un chico o chica que he conocido a través de Internet |
| 5 | Responder a un mensaje en el que me insultan u ofenden |
| 6 | Responder a un mensaje en el que alguien que no conozco hace ofrecimientos |
| 7 | Colgar una foto mía de carácter sexual. |
| 8 | Colgar una foto de mi pareja de carácter sexual. |
| 9 | Visitar una página de Internet de contenidos eróticos o pornográficos |
| 10 | Aceptar como amigo en la red a una persona desconocida |
| 11 | Difundir mensajes en los que se indulta u ofende a otras personas |
| 12 | Usar webcam cuando me comunico con amigos o amigas |
| 13 | Hablar con mi madre o con mi padre sobre lo que hago a través de internet |
| 14 | Hablar con mis amigos/as sobre lo que hago a través de internet |
| 15 | Me ha insultado o ridiculizado |
| 16 | Me ha dicho que no valía nada |
| 17 | Me ha intentado aislar de mis amistades |
| 18 | Me ha intentado controlar decidiendo por mí hasta el más mínimo detalle |
| 19 | Me ha hecho sentir miedo |
| 20 | Me ha amenazado con agredirme para hacer cosas que no quería |
| 21 | Me ha intimidado con frases, insultos o conductas de carácter sexual |
| 22 | He recibido mensajes a través de Internet o el móvil en los que me insultaban |
| 23 | Ha difundido mensajes, insultos o imágenes por la red o por el móvil sin permiso |
| 24 | Me trataba de controlar a través del móvil |
| 25 | Me ha culpado de provocar la violencia que he sufrido alguna vez |
| 26 | Ha usado mis contraseñas, que yo había dado confiadamente, para controlarme |
| 27 | Me ha presionado para actividades de tipo sexual en las que no quería |
| 28 | Le he insultado o ridiculizado |
| 29 | Le he dicho que no valía nada |
| 30 | Le he intentado aislar de sus amistades |
| 31 | Le he intentado controlar, decidiendo por ella hasta el más mínimo detalle |
| 32 | Le he hecho sentir miedo |
| 33 | Le he amenazado con agredirla para obligarla a hacer cosas que no quería |
| 34 | Le he pegado |
| 35 | Le he enviado mensajes a través de Internet o móvil en los que la insultaba |
| 36 | He difundido fotos, insultos o imágenes de ella por Internet sin su permiso |
| 37 | He culpado de provocar mi violencia a la persona que la sufría |
| 38 | He tratado de controlarla a través del móvil |
| 39 | He usado sus contraseñas, para controlarla |
| 40 | La he presionado para que realizara conductas sexuales en las que no quería |
| 41 | He presumido de realizar alguna de las conductas anteriores ante otros |
